# Supplementary material
Source: MDPI journal article supplement (https://www.mdpi.com/1424-2818/13/5/212)
Supplement: s1 [file s1 › Table S2.pdf]

Table S2. Environmental layers (variables) used for calibration. ED=Euclidean distances from specific habitat types.

| Set | Depth | Slope | Aspect | Mean grain<br>size | Sediment<br>sorting | ED from mangrove<br>habitats | ED from rocky<br>shore habitats | Calcium<br>carbonate |
|-----|-------|-------|--------|--------------------|---------------------|------------------------------|---------------------------------|----------------------|
| 1   | X     | X     | X      | X                  | X                   | X                            | X                               | X                    |
| 2   | X     | X     |        | X                  |                     | X                            | X                               | X                    |
| 3   | X     | X     |        | X                  |                     |                              | X                               | X                    |
