# Supplementary material
Source: MDPI journal article supplement (https://www.mdpi.com/1424-2818/13/5/212)
Supplement: s1 [file s1 › Table S3.pdf]

Table S3. Species and their final model evaluation performed with test occurrences and independent data. M AUC r = Mean AUC ratio, p ROC = Partial ROC, OR = omission rate, AICc = Akaike Information Criterion corrected, CBI = continuous Boyce Index. Discarded models\*\*.

| Family         | Species                               | n  | M AUC r | p ROC | OR   | AICc   | CBI  |
|----------------|---------------------------------------|----|---------|-------|------|--------|------|
| ACANTHURIDAE   | <i>Prionurus punctatus</i>            | 26 | 1.99    | 0.00  | 0.00 | 905.47 | 0.69 |
| ACHIRIDAE      | <i>Achirus mazatlanus</i> **          | 39 | 1.95    | 0.00  | 0.33 | 794.19 | 0.45 |
| ALBULIDAE      | <i>Albula nemoptera</i> **            | 35 | 1.91    | 0.00  | 0.00 | 717.48 | 0.35 |
|                | <i>Albula vulpes</i> **               | 31 | 1.96    | 0.00  | 0.12 | 529.52 | 0.54 |
| APOGONIDAE     | <i>Apogon retrosella</i>              | 27 | 1.93    | 0.00  | 0.00 | 533.12 | 0.58 |
| BALISTIDAE     | <i>Balistes polylepis</i> **          | 46 | 1.93    | 0.00  | 0.45 | 571.02 | 0.83 |
| BATRACHOIDIDAE | <i>Porichthys analis</i>              | 28 | 1.97    | 0.00  | 0.00 | 69.20  | 0.75 |
| BELONIDAE      | <i>Strongylura exilis</i> **          | 36 | 1.98    | 0.00  | 0.11 | 406.94 | 0.54 |
| BLENNIIDAE     | <i>Entomacrodus chiostictus</i>       | 24 | 1.96    | 0.00  | 0.00 | 514.74 | 0.76 |
|                | <i>Hypsoblennius gentilis</i>         | 36 | 1.89    | 0.00  | 0.00 | 938.53 | 0.64 |
|                | <i>Ophioblennius steindachneri</i> ** | 43 | 1.80    | 0.00  | 0.00 | 134.09 | 0.55 |
| CARANGIDAE     | <i>Caranx caballus</i> **             | 24 | 1.88    | 0.00  | 0.10 | 690.71 | 0.70 |
|                | <i>Caranx caninus</i>                 | 33 | 1.93    | 0.00  | 0.00 | 809.00 | 0.89 |
|                | <i>Caranx sexfasciatus</i>            | 26 | 1.92    | 0.00  | 0.00 | 496.52 | 0.71 |
|                | <i>Caranx vinctus</i> **              | 27 | 1.90    | 0.00  | 0.33 | 324.24 | 0.59 |
|                | <i>Gnathanodon speciosus</i> **       | 24 | 1.83    | 0.00  | 0.15 | 557.48 | 0.65 |
|                | <i>Hemicaranx zelotes</i> **          | 24 | 1.81    | 0.00  | 0.24 | 666.91 | 0.40 |
|                | <i>Oligoplites altus</i>              | 31 | 1.90    | 0.00  | 0.00 | 591.81 | 0.83 |

|                 |                                     |    |      |      |      |        |       |
|-----------------|-------------------------------------|----|------|------|------|--------|-------|
|                 | <i>Oligoplites refulgens**</i>      | 29 | 1.85 | 0.00 | 0.33 | 215.98 | -0.29 |
|                 | <i>Oligoplites saurus**</i>         | 59 | 1.93 | 0.00 | 0.00 | 716.53 | 0.45  |
|                 | <i>Selene peruviana</i>             | 24 | 1.94 | 0.00 | 0.00 | 467.66 | 0.76  |
| CENTROPOMIDAE   | <i>Centropomus nigrescens</i>       | 25 | 1.90 | 0.00 | 0.00 | 628.22 | 0.58  |
| CHAENOPSIDAE    | <i>Abudefduf troschelii</i>         | 55 | 1.88 | 0.00 | 0.00 | 78.74  | 0.86  |
|                 | <i>Chaenopsis alepidota</i>         | 34 | 1.85 | 0.00 | 0.00 | 548.85 | 0.72  |
|                 | <i>Coralliozetus micropes</i>       | 29 | 1.93 | 0.00 | 0.00 | 488.92 | 0.79  |
|                 | <i>Emblemaria hypacanthus</i>       | 31 | 1.94 | 0.00 | 0.00 | 339.88 | 0.80  |
| CHAETODONTIDAE  | <i>Chaetodon humeralis</i>          | 28 | 1.86 | 0.00 | 0.00 | 523.82 | 0.70  |
|                 | <i>Johnrandallia nigrirostris**</i> | 32 | 1.90 | 0.00 | 0.13 | 621.78 | 0.55  |
| CHANIDAE        | <i>Chanos chanos**</i>              | 55 | 1.93 | 0.00 | 0.00 | 668.12 | 0.57  |
| CLUPEIDAE       | <i>Harengula thrissina</i>          | 50 | 1.89 | 0.00 | 0.00 | 362.42 | 0.67  |
|                 | <i>Labrisomus xanti</i>             | 47 | 1.99 | 0.00 | 0.00 | 516.77 | 0.85  |
|                 | <i>Lile stolifera**</i>             | 43 | 1.86 | 0.00 | 0.10 | 238.87 | -0.11 |
|                 | <i>Opisthonema libertate**</i>      | 40 | 1.79 | 0.00 | 0.35 | 403.91 | 0.60  |
|                 | <i>Opisthonema medirastre**</i>     | 24 | 1.91 | 0.00 | 0.00 | 511.06 | 0.49  |
| CYNOGLOSSIDAE   | <i>Symphurus atramentatus</i>       | 24 | 1.89 | 0.00 | 0.00 | 716.19 | 0.78  |
| DACTYLOSCOPIDAE | <i>Dactylagnus mundus</i>           | 32 | 1.93 | 0.00 | 0.00 | 393.74 | 0.73  |
| DIODONTIDAE     | <i>Diodon holocanthus</i>           | 88 | 1.91 | 0.00 | 0.00 | 448.47 | 0.81  |
|                 | <i>Diodon hystrix</i>               | 42 | 1.91 | 0.00 | 0.00 | 216.71 | 0.96  |
| ELEOTRIDAE      | <i>Dormitator latifrons**</i>       | 32 | 1.95 | 0.00 | 0.22 | 65.19  | 0.61  |
| ELOPIDAE        | <i>Elops affinis</i>                | 27 | 1.90 | 0.00 | 0.00 | 477.99 | 0.87  |
| ENGRAULIDAE     | <i>Anchoa ischana**</i>             | 48 | 1.99 | 0.00 | 0.00 | 449.72 | 0.48  |
|                 | <i>Anchoa nasus</i>                 | 43 | 1.97 | 0.00 | 0.00 | 124.94 | 0.87  |

|               |                                  |    |      |      |      |        |       |
|---------------|----------------------------------|----|------|------|------|--------|-------|
| EPHIPPIDAE    | <i>Chaetodipterus zonatus</i> ** | 41 | 1.91 | 0.00 | 0.15 | 226.09 | 0.60  |
| FISTULARIIDAE | <i>Fistularia commersonii</i> ** | 47 | 1.93 | 0.00 | 0.33 | 688.23 | 0.70  |
| GERREIDAE     | <i>Diapterus peruvianus</i>      | 62 | 1.93 | 0.00 | 0.00 | 724.93 | 0.75  |
|               | <i>Eucinostomus currani</i>      | 74 | 1.96 | 0.00 | 0.00 | 340.60 | 0.86  |
|               | <i>Eucinostomus dowii</i>        | 92 | 1.89 | 0.00 | 0.00 | 523.24 | 0.73  |
|               | <i>Eucinostomus entomelas</i>    | 65 | 1.77 | 0.00 | 0.00 | 295.20 | 0.72  |
|               | <i>Eucinostomus gracilis</i>     | 81 | 1.92 | 0.00 | 0.00 | 840.17 | 0.81  |
|               | <i>Eugerres axillaris</i> **     | 50 | 1.94 | 0.00 | 0.65 | 500.99 | -0.48 |
|               | <i>Eugerres lineatus</i> **      | 31 | 1.97 | 0.00 | 0.33 | 174.25 | 0.37  |
|               | <i>Gerres cinereus</i> **        | 60 | 1.93 | 0.00 | 0.56 | 773.22 | 0.59  |
| GOBIESOCIDAE  | <i>Tomicodon boehlkei</i>        | 30 | 1.78 | 0.00 | 0.00 | 4.03   | 0.75  |
| GOBIIDAE      | <i>Barbulifer pantherinus</i>    | 34 | 1.91 | 0.00 | 0.00 | 788.34 | 0.77  |
|               | <i>Bathygobius ramosus</i> **    | 41 | 1.83 | 0.00 | 0.11 | 679.24 | 0.23  |
|               | <i>Chriolepis zebra</i>          | 30 | 1.88 | 0.00 | 0.00 | 153.68 | 0.84  |
|               | <i>Coryphopterus urospilus</i>   | 30 | 1.91 | 0.00 | 0.00 | 496.83 | 0.80  |
|               | <i>Ctenogobius manglicola</i> ** | 26 | 1.99 | 0.00 | 0.42 | 447.31 | 0.68  |
|               | <i>Ctenogobius sagittula</i>     | 68 | 1.92 | 0.00 | 0.00 | 364.30 | 0.63  |
|               | <i>Elacatinus digueti</i>        | 24 | 1.82 | 0.00 | 0.00 | 453.11 | 0.75  |
|               | <i>Gillichthys mirabilis</i> **  | 26 | 1.87 | 0.00 | 0.38 | 877.28 | 0.72  |
|               | <i>Gobiosoma chiquita</i>        | 48 | 1.88 | 0.00 | 0.00 | 574.60 | 0.86  |
|               | <i>Lythrypnus dalli</i>          | 24 | 1.96 | 0.00 | 0.00 | 739.59 | 0.90  |
|               | <i>Lythrypnus pulchellus</i>     | 26 | 1.98 | 0.00 | 0.00 | 640.24 | 0.81  |
|               | <i>Quietula y-cauda</i>          | 56 | 1.97 | 0.00 | 0.00 | 155.99 | 0.78  |
| GYMNURIDAE    | <i>Gymnura marmorata</i>         | 28 | 1.85 | 0.00 | 0.00 | 260.71 | 0.83  |

|               |                                    |    |      |      |      |        |       |
|---------------|------------------------------------|----|------|------|------|--------|-------|
| HAEMULIDAE    | <i>Anisotremus interruptus</i>     | 24 | 1.95 | 0.00 | 0.00 | 528.52 | 0.89  |
|               | <i>Conodon serrifer**</i>          | 27 | 1.89 | 0.00 | 0.52 | 569.02 | 0.72  |
|               | <i>Haemulon flaviguttatum**</i>    | 34 | 1.99 | 0.00 | 0.11 | 672.70 | 0.70  |
|               | <i>Haemulon maculicauda**</i>      | 36 | 1.96 | 0.00 | 0.00 | 331.58 | 0.59  |
|               | <i>Haemulon scudderii**</i>        | 41 | 1.88 | 0.00 | 0.00 | 436.59 | 0.54  |
|               | <i>Haemulon sexfasciatum</i>       | 43 | 1.96 | 0.00 | 0.00 | 523.84 | 0.88  |
|               | <i>Haemulon steindachneri**</i>    | 40 | 1.98 | 0.00 | 0.31 | 541.72 | 0.64  |
|               | <i>Haemulopsis elongatus</i>       | 29 | 1.80 | 0.00 | 0.00 | 180.65 | 0.86  |
|               | <i>Haemulopsis leuciscus</i>       | 44 | 1.76 | 0.00 | 0.00 | 661.75 | 0.66  |
|               | <i>Haemulopsis nitidus**</i>       | 30 | 1.92 | 0.00 | 0.00 | 767.18 | 0.57  |
|               | <i>Orthopristis cantharinus</i>    | 25 | 1.86 | 0.00 | 0.00 | 630.76 | 0.55  |
|               | <i>Orthopristis chalceus</i>       | 48 | 1.98 | 0.00 | 0.00 | 329.36 | 0.77  |
|               | <i>Orthopristis reddingi**</i>     | 48 | 1.77 | 0.00 | 0.00 | 536.53 | 0.45  |
|               | <i>Pomadasys bayanus</i>           | 43 | 1.88 | 0.00 | 0.00 | 421.67 | 0.76  |
|               | <i>Pomadasys branickii**</i>       | 50 | 1.83 | 0.00 | 0.24 | 474.21 | 0.71  |
|               | <i>Pomadasys macracanthus</i>      | 44 | 1.92 | 0.00 | 0.00 | 584.63 | 0.85  |
|               | <i>Pomadasys panamensis</i>        | 34 | 1.94 | 0.00 | 0.00 | 422.63 | 0.94  |
| HEMIRAMPHIDAE | <i>Hemiramphus saltator</i>        | 27 | 1.94 | 0.00 | 0.00 | 456.45 | 0.83  |
|               | <i>Hyporhamphus naos</i>           | 42 | 1.88 | 0.00 | 0.00 | 991.69 | 0.59  |
|               | <i>Hyporhamphus rosae**</i>        | 40 | 1.93 | 0.00 | 0.62 | 707.64 | 0.74  |
|               | <i>Hyporhamphus unifasciatus</i>   | 48 | 1.85 | 0.00 | 0.00 | 631.97 | 0.75  |
| HOLOCENTRIDAE | <i>Myripristis leiognathus</i>     | 29 | 1.94 | 0.00 | 0.00 | 513.66 | 0.77  |
|               | <i>Sargocentron suborbitalis**</i> | 29 | 1.92 | 0.00 | 0.34 | 369.65 | -0.23 |
| KYPHOSIDAE    | <i>Kyphosus elegans**</i>          | 24 | 1.92 | 0.00 | 0.00 | 532.96 | 0.25  |

|               |                                     |    |      |      |       |        |      |
|---------------|-------------------------------------|----|------|------|-------|--------|------|
| LABRIDAE      | <i>Bodianus diplotaenia</i>         | 32 | 1.84 | 0.00 | 0.00  | 414.39 | 0.88 |
|               | <i>Halichoeres dispilus**</i>       | 30 | 1.95 | 0.00 | 0.00  | 242.28 | 0.50 |
|               | <i>Thalassoma lucasanum</i>         | 54 | 1.79 | 0.00 | 0.00  | 198.33 | 0.76 |
| LABRISOMIDAE  | <i>Exerpes asper</i>                | 33 | 1.89 | 0.00 | 0.00  | 487.10 | 0.83 |
|               | <i>Malacoctenus hubbsi</i>          | 28 | 1.89 | 0.00 | 0.00  | 795.64 | 0.89 |
|               | <i>Paraclinus mexicanus</i>         | 29 | 1.90 | 0.00 | 0.00  | 489.41 | 0.86 |
|               | <i>Paraclinus sini</i>              | 43 | 1.77 | 0.00 | 0.00  | 537.63 | 0.84 |
| LUTJANIDAE    | <i>Hoplopagrus guentheri**</i>      | 36 | 1.94 | 0.00 | 0.12  | 324.80 | 0.51 |
|               | <i>Lutjanus aratus</i>              | 47 | 1.93 | 0.00 | 0.00  | 504.12 | 0.90 |
|               | <i>Lutjanus argentiventris</i>      | 78 | 1.83 | 0.00 | 0.00  | 714.29 | 0.89 |
|               | <i>Lutjanus colorado</i>            | 35 | 1.84 | 0.00 | 0.00  | 758.04 | 0.88 |
|               | <i>Lutjanus guttatus</i>            | 29 | 1.92 | 0.00 | 0.00  | 650.70 | 0.68 |
|               | <i>Lutjanus novemfasciatus**</i>    | 71 | 1.74 | 0.00 | 0.00  | 699.17 | 0.57 |
|               | <i>Lutjanus peru</i>                | 25 | 1.77 | 0.00 | 0.00  | 516.94 | 0.75 |
| MALACANTHIDAE | <i>Caulolatilus affinis**</i>       | 24 | 1.99 | 0.00 | -0.24 | 894.58 | 0.85 |
| MUGILIDAE     | <i>Mugil cephalus**</i>             | 54 | 1.79 | 0.00 | 0.00  | 309.85 | 0.50 |
|               | <i>Mugil curema</i>                 | 81 | 1.83 | 0.00 | 0.00  | 477.99 | 0.62 |
| MULLIDAE      | <i>Mulloidichthys dentatus</i>      | 45 | 1.86 | 0.00 | 0.00  | 638.58 | 0.80 |
|               | <i>Pseudupeneus grandisquamis**</i> | 44 | 1.84 | 0.00 | 0.00  | 365.40 | 0.55 |
| MURAENIDAE    | <i>Gymnothorax castaneus</i>        | 35 | 1.94 | 0.00 | 0.00  | 595.54 | 0.82 |
|               | <i>Gymnothorax equatorialis</i>     | 24 | 1.87 | 0.00 | 0.00  | 324.08 | 0.64 |
|               | <i>Gymnothorax panamensis**</i>     | 24 | 1.99 | 0.00 | 0.00  | 416.74 | 0.58 |
|               | <i>Muraena lentiginosa</i>          | 31 | 1.91 | 0.00 | 0.00  | 455.82 | 0.69 |

|                 |                                      |    |      |      |      |        |       |
|-----------------|--------------------------------------|----|------|------|------|--------|-------|
| NARCINIDAE      | <i>Diplobatis ommata**</i>           | 28 | 1.87 | 0.00 | 0.33 | 521.40 | 0.73  |
| NEMATISTIIDAE   | <i>Nematistius pectoralis</i>        | 33 | 1.88 | 0.00 | 0.00 | 537.41 | 0.83  |
| OPHICHTHIDAE    | <i>Myrichthys tigrinus**</i>         | 32 | 1.89 | 0.00 | 0.65 | 639.36 | -0.38 |
| OPHIDIIDAE      | <i>Ophidion iris</i>                 | 30 | 1.81 | 0.00 | 0.00 | 612.16 | 0.75  |
| PARALICHTHYIDAE | <i>Citharichthys gilberti</i>        | 53 | 1.92 | 0.00 | 0.00 | 616.40 | 0.77  |
|                 | <i>Citharichthys platophrys</i>      | 24 | 1.88 | 0.00 | 0.00 | 112.39 | 0.95  |
|                 | <i>Cyclopsetta panamensis**</i>      | 37 | 1.97 | 0.00 | 0.00 | 686.30 | 0.56  |
|                 | <i>Etropus crossotus</i>             | 69 | 1.91 | 0.00 | 0.00 | 463.84 | 0.77  |
|                 | <i>Hippoglossina tetraphthalma**</i> | 27 | 1.99 | 0.00 | 0.00 | 356.11 | 0.47  |
|                 | <i>Paralichthys woolmani**</i>       | 45 | 1.88 | 0.00 | 0.11 | 496.94 | 0.75  |
| PHOLIDICTHYIDAE | <i>Plagiotremus azaleus**</i>        | 24 | 1.90 | 0.00 | 0.30 | 727.12 | 0.58  |
| POLYNEMIDAE     | <i>Polydactylus approximans</i>      | 36 | 1.99 | 0.00 | 0.00 | 555.08 | 0.89  |
| POMACANTHIDAE   | <i>Holacanthus passer**</i>          | 35 | 1.93 | 0.00 | 0.00 | 629.71 | 0.59  |
|                 | <i>Pomacanthus zonipectus</i>        | 33 | 1.81 | 0.00 | 0.00 | 274.51 | 0.82  |
| POMACENTRIDAE   | <i>Acanthemblemaria crockeri</i>     | 31 | 1.92 | 0.00 | 0.00 | 163.59 | 0.81  |
|                 | <i>Chromis atrilobata**</i>          | 29 | 1.88 | 0.00 | 0.28 | 442.73 | 0.77  |
|                 | <i>Chromis limbaughi</i>             | 31 | 1.83 | 0.00 | 0.00 | 297.50 | 0.98  |
|                 | <i>Microspathodon dorsalis</i>       | 32 | 1.83 | 0.00 | 0.00 | 718.23 | 0.85  |
|                 | <i>Stegastes rectifraenum</i>        | 62 | 1.88 | 0.00 | 0.00 | 505.28 | 0.72  |
|                 | <i>Pristigenys serrula</i>           | 29 | 1.87 | 0.00 | 0.00 | 662.51 | 0.93  |
| RHINCODONTIDAE  | <i>Rhincodon typus**</i>             | 32 | 1.90 | 0.00 | 0.15 | 472.43 | -0.54 |
| SCARIDAE        | <i>Nicholsina denticulata**</i>      | 24 | 1.95 | 0.00 | 0.00 | 332.02 | 0.54  |
|                 | <i>Scarus compressus</i>             | 30 | 1.87 | 0.00 | 0.00 | 813.62 | 0.73  |
|                 | <i>Scarus ghobban**</i>              | 50 | 1.77 | 0.00 | 0.11 | 338.64 | 0.61  |

|              |                                     |    |      |      |      |         |      |
|--------------|-------------------------------------|----|------|------|------|---------|------|
| SCIAENIDAE   | <i>Bairdiella icistia</i>           | 30 | 1.89 | 0.00 | 0.00 | 304.78  | 0.76 |
|              | <i>Cynoscion parvipinnis</i>        | 31 | 1.95 | 0.00 | 0.00 | 530.24  | 0.84 |
|              | <i>Cynoscion stolzmanni**</i>       | 24 | 1.88 | 0.00 | 0.00 | 588.05  | 0.54 |
|              | <i>Cynoscion xanthulus**</i>        | 30 | 1.94 | 0.00 | 0.19 | 747.54  | 0.63 |
|              | <i>Elacatinus puncticulatus</i>     | 28 | 1.91 | 0.00 | 0.00 | 633.59  | 0.70 |
|              | <i>Micropogonias ectenes**</i>      | 34 | 1.87 | 0.00 | 0.10 | 611.51  | 0.56 |
|              | <i>Pareques viola</i>               | 29 | 1.92 | 0.00 | 0.00 | 363.91  | 0.86 |
|              | <i>Umbrina xanti</i>                | 25 | 1.93 | 0.00 | 0.00 | 596.34  | 0.75 |
| SCOMBRIDAE   | <i>Auxis thazard**</i>              | 24 | 1.85 | 0.00 | 0.00 | 388.00  | 0.50 |
| SCORPAENIDAE | <i>Scorpaena mystes</i>             | 34 | 1.78 | 0.00 | 0.00 | 414.48  | 0.76 |
|              | <i>Scorpaenodes xyris**</i>         | 26 | 1.90 | 0.00 | 0.33 | 414.95  | 0.57 |
| SERRANIDAE   | <i>Alphestes immaculatus</i>        | 38 | 1.92 | 0.00 | 0.00 | 589.22  | 0.91 |
|              | <i>Cephalopholis panamensis**</i>   | 31 | 1.93 | 0.00 | 0.42 | 571.51  | 0.70 |
|              | <i>Diplectrum macropoma</i>         | 24 | 1.88 | 0.00 | 0.00 | 1004.50 | 0.95 |
|              | <i>Diplectrum pacificum</i>         | 37 | 1.81 | 0.00 | 0.00 | 591.28  | 0.83 |
|              | <i>Diplectrum rostrum</i>           | 24 | 1.88 | 0.00 | 0.00 | 450.04  | 0.73 |
|              | <i>Engraulis mordax</i>             | 24 | 1.83 | 0.00 | 0.00 | 273.81  | 0.96 |
|              | <i>Epinephelus labriformis**</i>    | 37 | 1.93 | 0.00 | 0.15 | 520.73  | 0.55 |
|              | <i>Epinephelus niphobles</i>        | 24 | 1.98 | 0.00 | 0.00 | 921.06  | 0.55 |
|              | <i>Mycteroperca rosacea</i>         | 25 | 1.88 | 0.00 | 0.00 | 702.69  | 0.83 |
|              | <i>Paralabrax auroguttatus</i>      | 29 | 1.92 | 0.00 | 0.00 | 341.48  | 0.82 |
|              | <i>Paralabrax maculatofasciatus</i> | 79 | 1.93 | 0.00 | 0.00 | 489.24  | 0.75 |
|              | <i>Paranthias colonus**</i>         | 26 | 1.82 | 0.00 | 0.05 | 329.01  | 0.49 |
|              | <i>Pseudogramma thaumasium</i>      | 24 | 1.88 | 0.00 | 0.00 | 371.92  | 0.81 |

|                |                                   |    |      |      |      |        |      |
|----------------|-----------------------------------|----|------|------|------|--------|------|
|                | <i>Rypticus bicolor</i>           | 28 | 1.80 | 0.00 | 0.00 | 670.99 | 0.87 |
|                | <i>Serranus psittacinus**</i>     | 31 | 1.91 | 0.00 | 0.00 | 388.20 | 0.56 |
| SPARIDAE       | <i>Calamus brachysomus</i>        | 30 | 1.90 | 0.00 | 0.00 | 180.88 | 0.70 |
| SYNGNATHIDAE   | <i>Doryrhamphus excisus</i>       | 24 | 1.85 | 0.00 | 0.00 | 358.95 | 0.95 |
|                | <i>Hippocampus ingens</i>         | 28 | 1.89 | 0.00 | 0.00 | 226.43 | 0.74 |
|                | <i>Syngnathus auliscus</i>        | 44 | 1.93 | 0.00 | 0.00 | 640.22 | 0.72 |
| SYNODONTIDAE   | <i>Synodus lacertinus**</i>       | 24 | 2.04 | 0.00 | 0.00 | 224.01 | 0.58 |
|                | <i>Synodus scituliceps</i>        | 55 | 1.88 | 0.00 | 0.00 | 518.45 | 0.68 |
| TETRAODONTIDAE | <i>Canthigaster punctatissima</i> | 50 | 1.99 | 0.00 | 0.00 | 196.21 | 0.71 |
|                | <i>Sphoeroides annulatus</i>      | 93 | 1.86 | 0.00 | 0.00 | 283.75 | 0.77 |
|                | <i>Sphoeroides lispus**</i>       | 35 | 1.99 | 0.00 | 0.00 | 278.31 | 0.54 |
|                | <i>Sphoeroides lobatus**</i>      | 53 | 1.90 | 0.00 | 0.08 | 679.21 | 0.61 |
| TRIPTERYGIIDAE | <i>Crocodilichthys gracilis</i>   | 30 | 1.95 | 0.00 | 0.00 | 761.40 | 0.77 |
|                | <i>Enneanectes carminalis</i>     | 24 | 1.81 | 0.00 | 0.00 | 633.00 | 0.82 |
| UROTRYGONIDAE  | <i>Urobatis maculatus</i>         | 26 | 1.90 | 0.00 | 0.00 | 530.47 | 0.69 |
