# Supplementary material
Source: MDPI journal article supplement (https://www.mdpi.com/1424-2818/13/5/212)

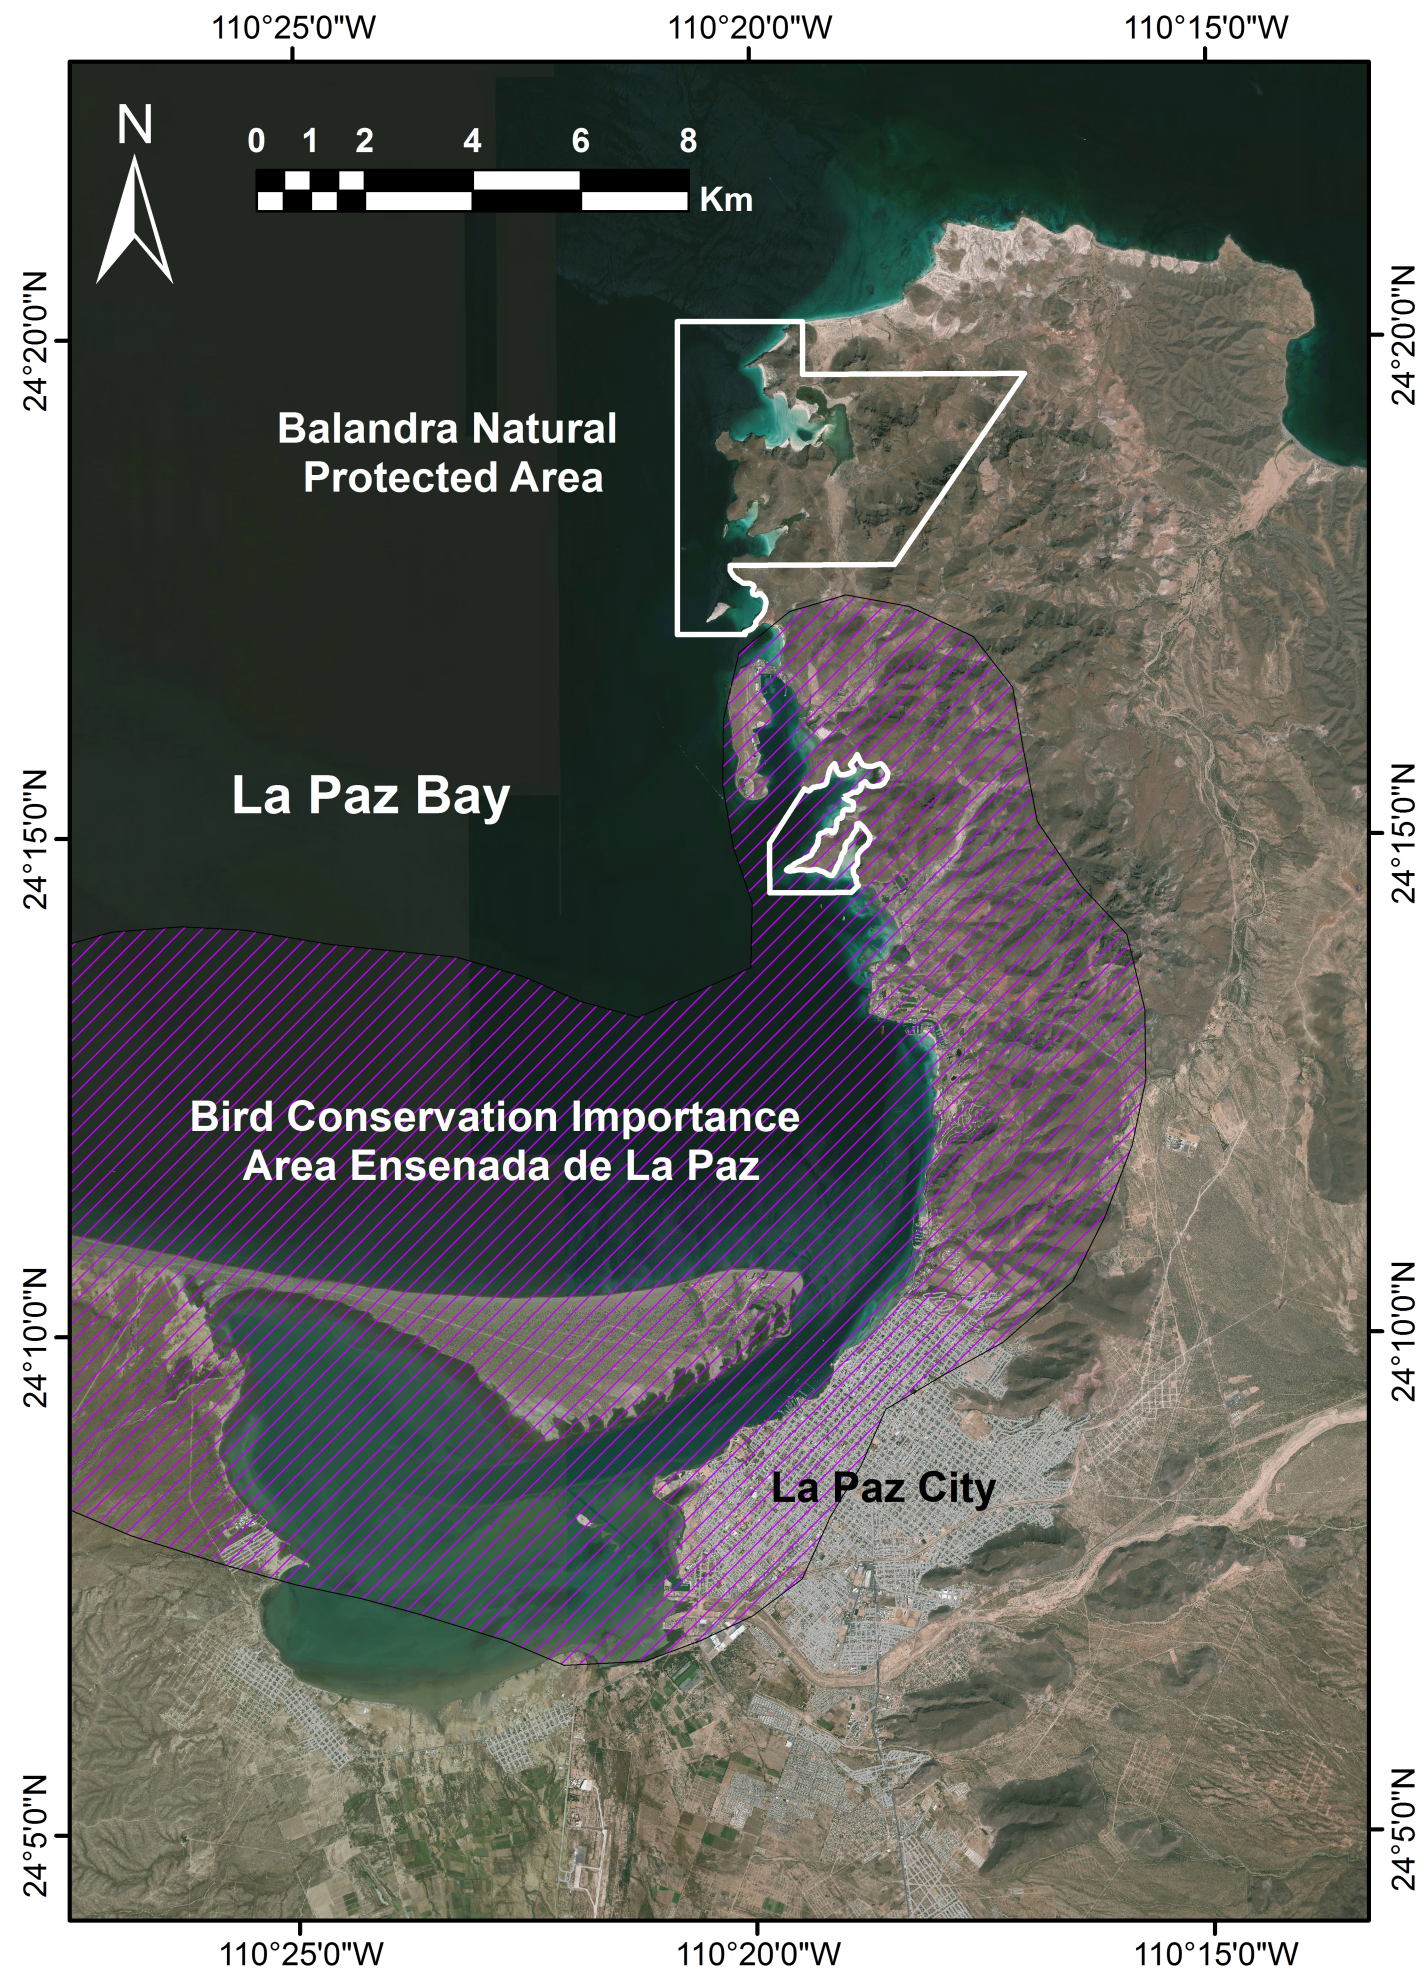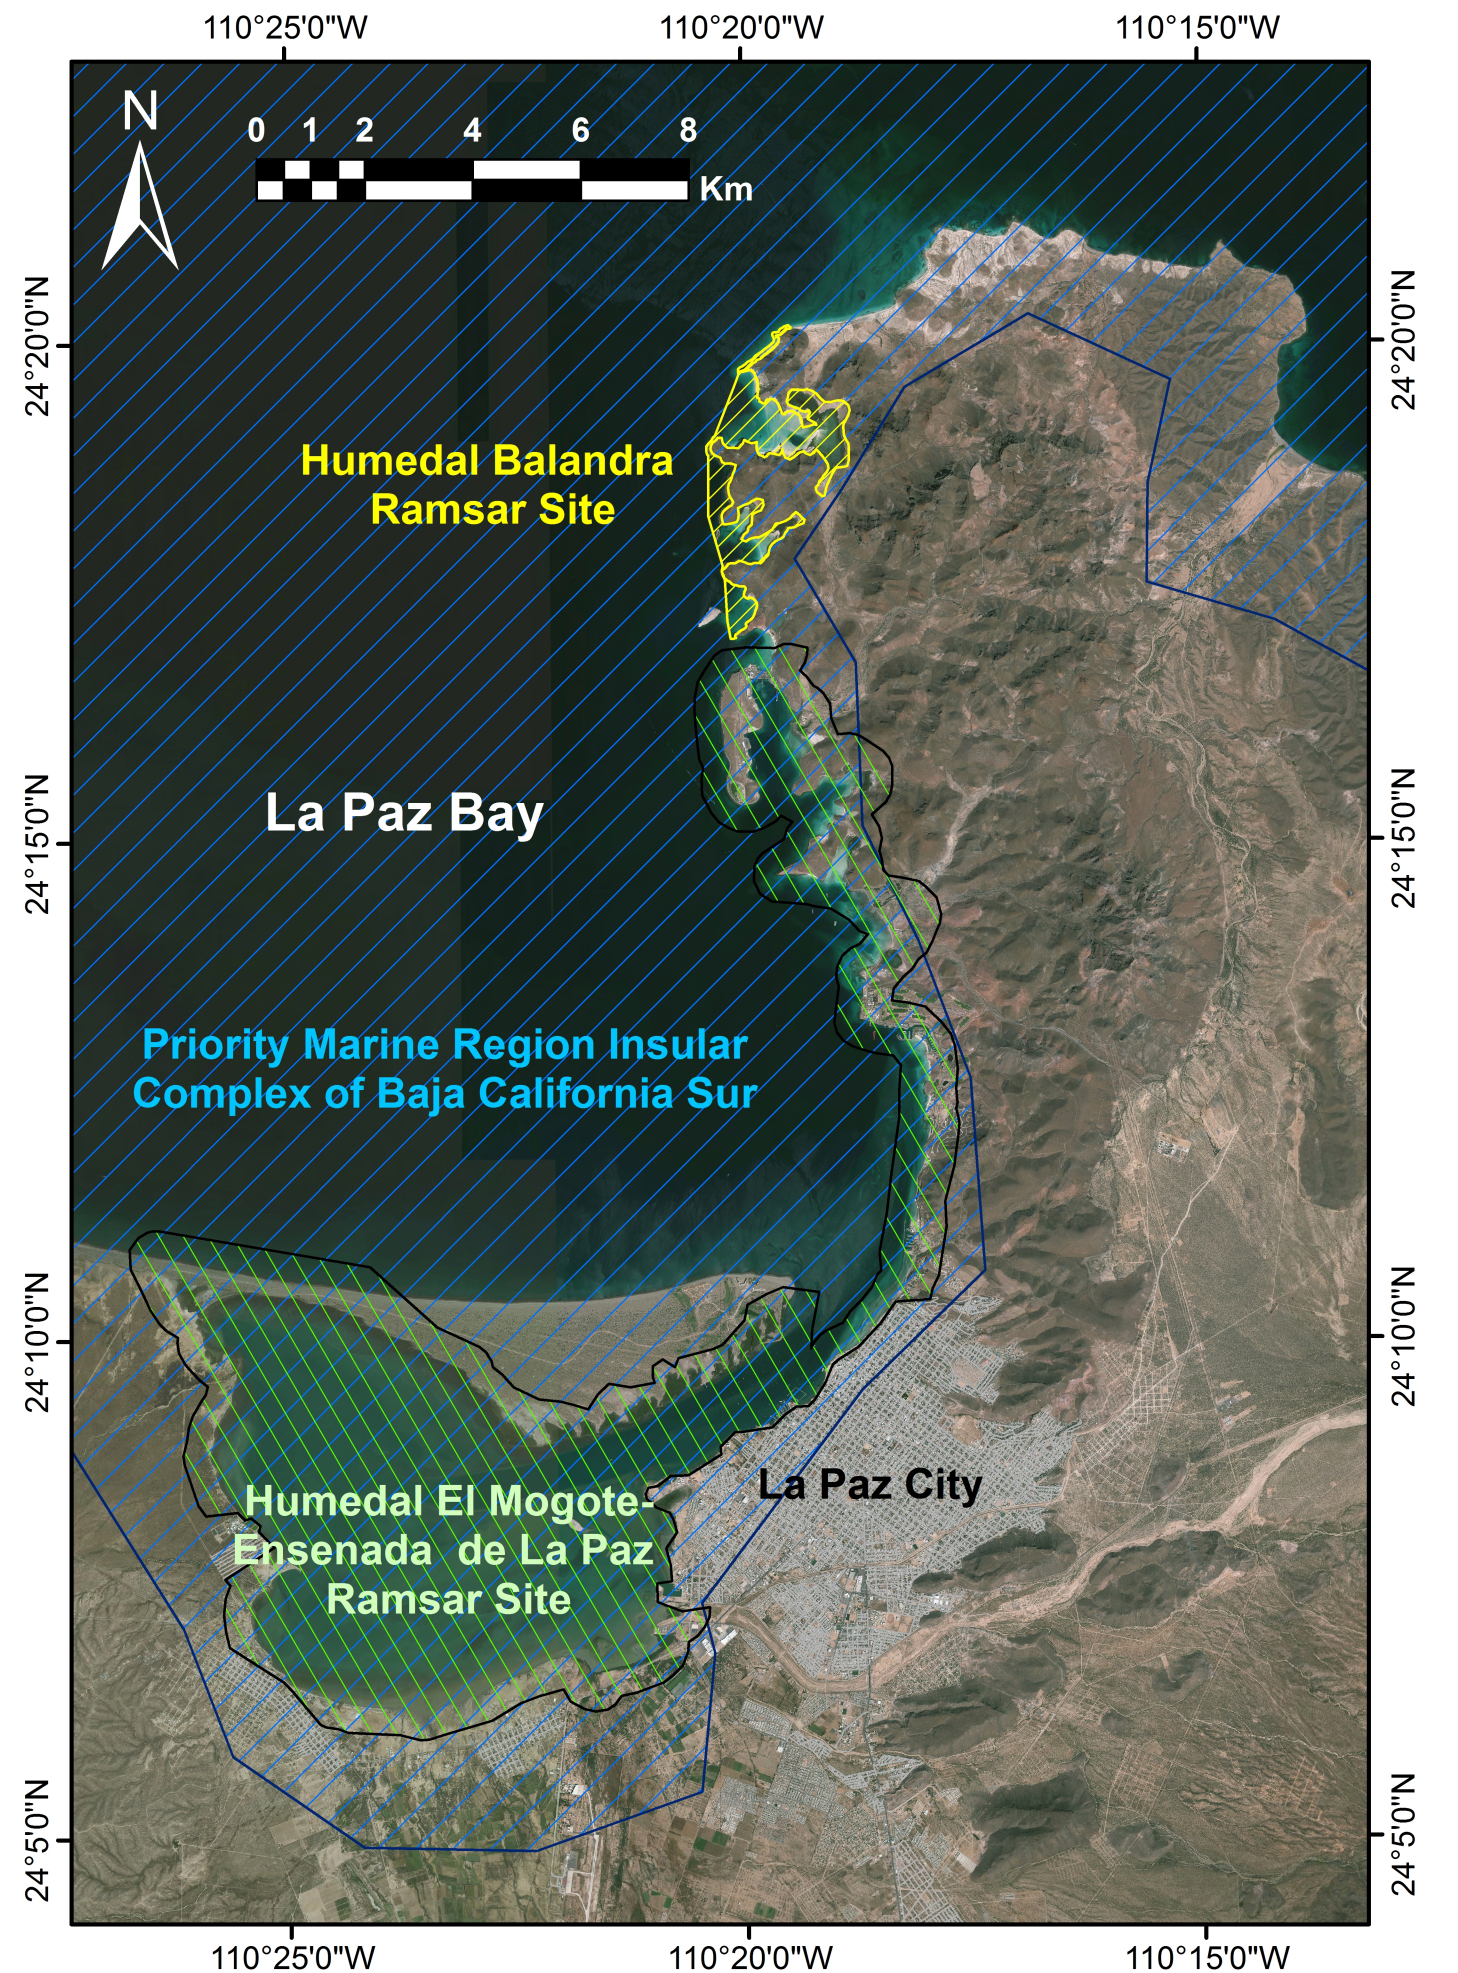

Supplement: s1 [file s1 › Figure S1.pdf]
